# Supplementary material
Source: Springer Nature journal article supplement (https://www.springermedizin.de/resource/supplementary/12884_2010_353_MOESM1_ESM.pdf/9457512)

**Global Network's Subcommittee for the EmONC Trial**

**Data Coordinating Center**

**EmONC Trial Country Team and Advisory Group**

**EmONC Cluster Teams**

**Community (Village) Committees**

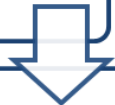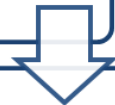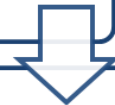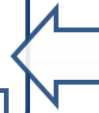

Supplement: MOESM1 [file 9457512]
